# Supplementary material
Source: HighWire-hosted journal article supplement (https://bmjopen.bmj.com/content/11/9/e046712)
Supplement: inline-supplementary-material-1 [file inline-supplementary-material-1.pdf]

**Appendix: Interpretation of Oxford Hip Scores and EQ-5D in patients receiving a hip arthroplasty**

The OHS is a 12-item score with 4 levels, thus scores vary between 0-48, with higher scores being the best outcome. The clinically meaningful difference is considered to be an increase of +11 points and a change of +5 is considered statistically meaningful (ie greater than background 'noise')

Beard DJ, Harris K, Dawson J, *et al.* Meaningful changes for the Oxford hip and knee scores after joint replacement surgery. *J Clin Epidemiol* 2015; **68**: 73–9.

The EQ-5D has been very widely studied in several disease areas. There have been several studies looking at what is a clinically meaningful difference and a meta-analysis yielded an average difference of 0.18

Coretti S, Ruggeri M, McNamee P. The minimum clinically important difference for EQ-5D index: A critical review. *Expert Rev. Pharmacoeconomics Outcomes Res.* 2014; **14**: 221–33
