# Supplementary material
Source: HighWire-hosted journal article supplement (https://bmjopen.bmj.com/content/11/9/e046712)
Supplement: inline-supplementary-material-2 [file inline-supplementary-material-2.pdf]

**Supplementary Table 1: Baseline data on measures of pre-operative health status (multimorbidity, frailty and morbidity burden) in patients who underwent primary THR in HES APC during the date period in which PROMs were collected (N=2992)**

|                                       | PROMs data   | No PROMs data |
|---------------------------------------|--------------|---------------|
| <b>Charlson comorbidity index</b>     |              |               |
| 0                                     | 1,013 (68.7) | 931 (61.4)    |
| 1                                     | 123 (8.3)    | 152 (10.0)    |
| 2                                     | 205 (13.9)   | 254 (16.7)    |
| 3+                                    | 134 (9.1)    | 180 (11.9)    |
| <b>Electronic frailty index (eFI)</b> |              |               |
| 0-4                                   | 831 (56.3)   | 752 (49.6)    |
| 5-8                                   | 544 (36.9)   | 593 (39.1)    |
| 9-12                                  | 93 (6.3)     | 151 (10.0)    |
| 13+                                   | 7 (0.5)      | 21 (1.4)      |
| <b>No. comorbid diseases</b>          |              |               |
| 0                                     | 378 (25.6)   | 320 (21.1)    |
| 1                                     | 497 (33.7)   | 464 (30.6)    |
| 2                                     | 346 (23.5)   | 364 (24.0)    |
| 3+                                    | 254 (17.2)   | 369 (24.3)    |
| <b>No. medications prescribed</b>     |              |               |
| 0-4                                   | 428 (29.0)   | 400 (26.4)    |
| 5-7                                   | 401 (27.2)   | 375 (24.7)    |
| 8-12                                  | 429 (29.1)   | 500 (33.0)    |
| 13+                                   | 217 (14.7)   | 242 (16.0)    |
| <b>No. contacts with primary care</b> |              |               |
| 0-7                                   | 471 (31.9)   | 464 (30.6)    |
| 8-11                                  | 335 (22.7)   | 358 (23.6)    |
| 12-17                                 | 384 (26.0)   | 334 (22.0)    |
| 18+                                   | 285 (19.3)   | 361 (23.8)    |
| <b>Total</b>                          | <b>1475</b>  | <b>1517</b>   |

Supplementary Table 2

## Influence of pre-operative health status on risk of hospital readmission within 90 days

|                                     | No. patients | Events | % Events | Unadjusted OR<br>(95% CI) | Adjusted OR* (95%<br>CI) |
|-------------------------------------|--------------|--------|----------|---------------------------|--------------------------|
| Charlson Comorbidity Index          |              |        |          |                           |                          |
| 0                                   | 4490         | 477    | 10.6     | Ref                       | Ref                      |
| 1                                   | 682          | 82     | 12.0     | 1.15 (0.90, 1.48)         | 1.09 (0.85, 1.40)        |
| 2                                   | 880          | 131    | 14.9     | 1.47 (1.19, 1.81)         | 1.41 (1.14, 1.74)        |
| 3+                                  | 630          | 96     | 15.2     | 1.51 (1.19, 1.92)         | 1.45 (1.14, 1.84)        |
| Count of chronic diseases           |              |        |          |                           |                          |
| 0                                   | 1901         | 192    | 10.1     | Ref                       | Ref                      |
| 1                                   | 2286         | 232    | 10.2     | 1.01 (0.82, 1.23)         | 1.01 (0.82, 1.23)        |
| 2                                   | 1430         | 205    | 14.3     | 1.49 (1.21, 1.84)         | 1.47 (1.19, 1.83)        |
| 3+                                  | 1065         | 157    | 14.7     | 1.54 (1.23, 1.93)         | 1.53 (1.21, 1.94)        |
| Count of medications prescribed     |              |        |          |                           |                          |
| 0-4                                 | 1963         | 180    | 9.2      | Ref                       | Ref                      |
| 5-7                                 | 1832         | 201    | 11.0     | 1.22 (0.99, 1.51)         | 1.22 (0.99, 1.51)        |
| 8-12                                | 1992         | 257    | 12.9     | 1.47 (1.20, 1.80)         | 1.45 (1.18, 1.78)        |
| 13+                                 | 895          | 148    | 16.5     | 1.96 (1.55, 2.48)         | 1.96 (1.54, 2.49)        |
| Count of contacts with primary care |              |        |          |                           |                          |
| 0-7                                 | 2167         | 204    | 9.4      | Ref                       | Ref                      |
| 8-11                                | 1598         | 172    | 10.8     | 1.16 (0.94, 1.44)         | 1.15 (0.93, 1.43)        |
| 12-17                               | 1528         | 192    | 12.6     | 1.38 (1.12, 1.70)         | 1.37 (1.11, 1.69)        |
| 18+                                 | 1389         | 218    | 15.7     | 1.79 (1.46, 2.20)         | 1.75 (1.42, 2.15)        |
| Electronic Frailty Index            |              |        |          |                           |                          |
| 0-4                                 | 4184         | 432    | 10.3     | Ref                       | Ref                      |
| 5-8                                 | 2064         | 270    | 13.1     | 1.31 (1.11, 1.54)         | 1.30 (1.10, 1.55)        |
| 9-12                                | 393          | 76     | 19.3     | 2.08 (1.59, 2.73)         | 2.01 (1.51, 2.67)        |
| 13+                                 | 41           | 8      | 19.5     | 2.11 (0.97, 4.59)         | 2.15 (0.97, 4.73)        |
| Total                               | 6682         | 786    | 11.8     |                           |                          |

\*The model was adjusted for age, sex, region of the residence, and year of surgery.

**Supplementary Table 3:**  
**Influence of pre-operative health status on length of stay in hospital**

|                                     | Total at risk | Median length of stay (IQR) |
|-------------------------------------|---------------|-----------------------------|
| Charlson Comorbidity Index          |               |                             |
| 0                                   | 4490          | 6 (4, 9)                    |
| 1                                   | 682           | 6 (5, 9)                    |
| 2                                   | 880           | 6 (4, 9)                    |
| 3+                                  | 630           | 7 (5, 9)                    |
| Count of chronic diseases           |               |                             |
| 0                                   | 1901          | 6 (4, 8)                    |
| 1                                   | 2286          | 6 (4, 9)                    |
| 2                                   | 1430          | 6 (4, 9)                    |
| 3+                                  | 1065          | 7 (5, 10)                   |
| Count of medications prescribed     |               |                             |
| 0-4                                 | 1963          | 6 (4, 8)                    |
| 5-7                                 | 1832          | 6 (4, 9)                    |
| 8-12                                | 1992          | 7 (5, 9)                    |
| 13+                                 | 895           | 7 (5, 10)                   |
| Count of contacts with primary care |               |                             |
| 0-7                                 | 2167          | 6 (4, 8)                    |
| 8-11                                | 1598          | 6 (4, 9)                    |
| 12-17                               | 1528          | 6 (4, 9)                    |
| 18+                                 | 1389          | 7 (5, 10)                   |
| Electronic Frailty Index            |               |                             |
| 0-4                                 | 4184          | 6 (4, 9)                    |
| 5-8                                 | 2064          | 6 (4, 9)                    |
| 9-12                                | 393           | 8 (5, 11)                   |
| 13+                                 | 41            | 8 (7, 13)                   |
| Total                               | 6682          | 6 (4, 9)                    |
